# Supplementary material for: The Lung Microbiome of Three Young Brazilian Patients With Cystic Fibrosis Colonized by Fungi
Source: Front Cell Infect Microbiol. 2020 Nov 11;10:598938. doi: 10.3389/fcimb.2020.598938 (PMC7686462; doi:10.3389/fcimb.2020.598938)
Supplement: Supplementary file 1 [file DataSheet_1.xlsx]

## Sheet: Patient A
Patient A
	Sample	PA1	PA2	PA3	PA4	PA5
	Date	2018-07-07	08/24/2018	09/14/2018	10/26/2018	11/30/2018
	Clinical condition	Exacerbation	Exacerbation	Ambulatory	Exacerbation	Ambulatory
	2001-02-01	0.39
	FUNGI (CULTURE)	A. fumigatus	NI	A. fumigatus	Aspergillus fumigatus	Aspergillus fumigatus
					Penicillium sp.	Torulaspora delbrueckii
	BACTERIA (CULTURE)	S. aureus MRSA		Burkholderia cepacia complex
		P. aeruginosa
		Burkholderia. cepacia complex
	ANTIBIOTIC THERAPY	Ciprofloxacin			Meropenem
		Tobramycin			Vancomicin
		Amoxi/Clav			Gentamycin
	ANTIFUNGALTHERAPY
METAGENOMIC DATA	VIRULENCE FACTOR / MICROORGANISM	Alpha-hemolysin precursor / S. aureus	3-phosphoshikimate 1-carboxyvinyltransferase / S. aureus	NI	3-isopropylmalate dehydrogenase / Burkholderia cepacia complex	PA3756 (HP)
					Recombinase A / Burkholderia cepacia complex	AscV protein / Aeromonas
		Bifunctional 3-deoxy-7-phosphoheptulonate synthase/chorismate mutase / L. monocitogenes	Imo2206 (HP)		3-dehydroquinase synthase / Burkholderia cepacia complex	Putative tRNA/rRNA methyltransferase / Actinobacillus
					Anthranilate synthase componente II / Burkholderia cepacia complex	Phosphoribosylfromylglycinamidine synthase / Vibrio
		Flagellin / B. cepacia complex	Alpha hemolysin precursor / S. aureus		Integral membrane protein MviN / Burkholderia cepacia complex	Two-component response regulator / H. influenzae
					Acetolactate synthase 3 catalytic subunit / Burkholderia cepacia complex	Cytochrome C-Type biogenesis / H. influenzae
					Pyruvato-wate dikinase / Burkholderia cepacia complex	HI1152 (HP)
						Outer membrane antigenic lipoprotein B / Actinobacillus
						HI0561 (HP)
	ANTIBIOTIC RESISTANCE GENES / MICROORGANISM	SAT-4 / Campylobacter coli	APH(3`)IIIa / C. coli	NI	ceoB / Burkholderia cepacia	MexB / P. aeruginosa
		ceoB/ Burkholderia cepacia	mecR1 / S. aureus		ceoA/ Burkholderia cepacia	MexC/ P. aeruginosa
						MexD / P. aeruginosa
						MexK / P. aeruginosa
						MexV / P. aeruginosa
						MexW / P. aeruginosa
						OprJ / P. aeruginosa
						OXA-50 / P. aeruginosa
						ErmB / E. faecium
	METAGENOME BACTERIA and FUNGI	Metataxonomic:	Metataxonomic:	Metataxonomic:	Metataxonomic:	Mtaxon:
		Staphylococcus sp.	Staphylococcus sp.	Staphylococcus sp.	Staphylococcus	Staphylococcus
		Rickettsiales		Rickettsiales	Neisseria	Ricketsiales
		Metagenomic:	Metagenomic:	Metagenomic:	Porphiromonas	Burkholderia cepacia complex
		S. aureus	S. aureus	NI	Hemophilus
					Metagenomic:	Mshotgun:
					S. aureus	S. aureus
					Burkholderia sp.	Burkholderia sp.
					B. multivorans	B. multivorans
					H. parainfluenzae	Ralstonia sp.
					N. flavescens
					Neisseria sp.
*FEV1, forced expiratory volume in one second; NI, no identification.

## Sheet: Patient B
Patient B
	Sample	PB1	PCB2	PB3
	Date	08/23/2018	10/26/2018	11/30/2018
	Clinical condition	Exacerbation	Ambulatory	Ambulatory
	FVC/FEV1	0.64
	FUNGI (CULTURE)	NI	Talaromyces sp.	Talaromyces amestolkiae
			Torulaspora delbrueckii
			Hanseniaspora sp.
	BACTERIA (CULTURE)		Burkholderia cepacia complex
	ANTIBIOTIC THERAPY	Ceftazidime
		Gentamicine
	ANTIFUNGALTHERAPY
METAGENOMIC DATA	VIRULENCE FACTOR / MICROORGANISM	Recombinase A / Burkholderia cepacia complex	Type III secretion system ATPase / Bordetella pertussis	MotA/TolQ/ExbB proton channel Family protein / B. pertussis
		Integral membrane protein MviN / Burkholderia cepacia complex	PA3756 (HP)	Lipid A biosynthesis lauroyl acyltransferase / B. pertussis
		Acetolactate synthase 3 catalytic subunit / Burkholderia cepacia complex		Recombinase A / Complex B. cepacea
		Putative oxidoreductase / Burkholderia cepacia complex
		Bifunctional GMP synthase/glutamine amidotransferase protein / Pasteurella
		3-phosphoshikimate 1-carboxyvinyltransferase / S. aureus
		Alpha-hemolysin precursor / S. aureus
		Imo2206 (HP)
		Bifunctional 3-deoxy-7-phosphoheptulonate synthase/chorismate mutase / L. monocitogenes
	ANTIBIOTIC RESISTANCE GENES / MICROORGANISM	SAT-4 / Campylobacter coli	blaZ / S. aureus	SmeA / Stenotrophomonas maltophila
		opcM / Burkholderia cepacia	MexB / P. aeruginosa	SmeC / Stenotrophomonas maltophila
		norA / Staphylococcus epidermidis	MexC / P. aeruginosa	SmeS / Stenotrophomonas maltophila
		mepA / S. aureus	MexD / P. aeruginosa	OXA-258 / Achromobacter ruhlandii
		tet(38) / S. aureus	MexK / P. aeruginosa	OprZ / Achromobacter insuavis
		mecA / S. aureus	MexY / P. aeruginosa	AxyY / Achromobacter insuavis
		aad(6) / Streptococcus oralis	basS / P. aeruginosa	AxyX / Achromobacter insuavis
			bcr-1 / P. aeruginosa	mdsB / Salmonella enterica
			OprJ / P. aeruginosa	catB2 / Pasteurella multocida
			OXA-60 / Ralstonia pickettii
	METAGENOME BACTERIA and FUNGI	Metataxonomic:	Metataxonomic:	Metataxonomic:
		Rickettsiales	Rickettsiales	Rickettsiales
		Streptococcus sp.	Streptococcus sp.	Streptococcus sp.
				Veillonella sp.
		Metagenomic:	Metagenomic:	Metagenomic:
		Burkholderia sp.	Burkholderia sp.	Burkholderia sp.
			Stenotrophomonas maltophilia	Capnocytophaga sp.
				Streptococcus salivarus
				Veillonella sp.
*FEV1, forced expiratory volume in one second; NI, no identification.

## Sheet: Patient C
Patient C
	Sample	PC1	PC2	PC3	PC4
	Date	05/18/2018	08/31/2018	09/14/2018	10/26/2018
	Clinical condition	Exacerbation	Exacerbation	Exacerbation	Ambulatory
	FEV1	0.37
	FUNGI (CULTURE)	Aspergillus fumigatus	Aspergillus fumigatus	Aspergillus fumigatus	Aspergillus fumigatus
		Candida albicans
	BACTERIA (CULTURE)	Achromobacter sp.	Pseudmonas aeruginosa	Achromobacter xylosoxidans	Pseudomonas aeruginosa
			Stenotrophomonas maltophilia	Chryseobacterium indologenes	Staphylococcus aureus
	ANTIBIOTIC THERAPY		Meropenem
			Gentamicin
	ANTIFUNGALTHERAPY	Itraconazole
METAGENOMIC DATA	VIRULENCE FACTOR / MICROORGANISM	NI	Malic enzyme	Malic enzyme	recombinase A / Burkholderia cepacia complex
			Integral membrane protein MviN / Burkholderia cepacia complex	HI0561 (HP)	Acetolactate synthase 3 catalytic subunit / Burkholderia cepacia complex
			RNA polymerase sigma factor RpoE / Burkholderia cepacia complex	3-isopropylmalate dehydrogenase / Burkholderia cepacia complex	3-phosphoshikimate 1-carboxyvinyltransferase / Burkholderia cepacia complex
			Putative oxidoreductase / Burkholderia cepacia complex	Recombinase A / Burkholderia cepacia complex	Flagellin / Burkholderia cepacia complex
			Pyruvate-water dikinase / Burkholderia cepacia complex	Anthranilate synthase componente II / Burkholderia cepacia complex
			Putative Type IV pilin protein PIA / Burkholderia cepacia complex	Acetolactate synthase 3 catalytic subunit / Burkholderia cepacia complex
			GDP manose 4,6-dehydratase / Vibro sp.	RNA polymerase sigma factor RpoE / Burkholderia cepacia complex
			HI1598 (HP)	Putative oxidoreductase / Burkholderia cepacia complex
			Putative cytidylyltransferase / Burkholderia cepacia complex	Pyruvate-water dikinase / Burkholderia cepacia complex
	ANTIBIOTIC RESISTANCE GENES / MICROORGANISM	fosA / P. aeruginosa	ceoA / Burkholderia cepacia	ceoA / Burkholderia cepacia	oblaZ / S. aureus
			ceoB / Burkholderia cepacia	ceoB / Burkholderia cepacia	omgrA / Staphylococcus sp.
			Omp38 / Burkholderia pseudomaleii	opcM / Burkholderia cepacia	arlS / S. aureus
			opcM / Burkholderia cepacia	amrA / Burkholderia pseudomaleii
			tetA-46 / S. australis	Mel / bacteria
			tetB-46 / S. australis	mefA / Exiguibacterium sp.
			smeE / Stenotrophomonas maltophilia
			smeD / Stenotrophomonas maltophilia
			adeF / Acinetobacter baumannii
			APH(3’)IIIa / Campylobacter coli
	METAGENOME BACTERIA and FUNGI	Metataxonomic:	Metataxonomic:	Metataxonomic:	Metatataxonomic:	Metagenomic:
		Staphylococcus sp.	Achromobacter sp.	Achromobacter sp.	Achromobacter sp.	Streptococcus salivatius
		Achromobacter sp.	Pseudomonas sp.	Streptococcus sp.	Streptococcus sp.	H. parainfluenzae
		Pseudomonas sp.	Streptococcus sp.	Stenotrophomonas sp.	Pseudomonas sp.	H. parahemolyticus
		Metagenomic:	Metagenomic:	Metagenomic:	Neisseria sp.	P. aeruginosa
		P. aeruginosa	Ralstonia sp.	A. xylosoxidans,	Prevotela sp.	Veillonella sp.
		A. xylosoxidans,	P. aeruginosa	Achromobacter sp.	Porphyromonas sp.	Neisseria sp.
		Achromobacter sp.	A. xylosoxidans	Bordetella sp.	Haemophilus sp.	N. flavensa
			Achromobacter sp.		Actinobacillus sp.	S. mitis oralis pneumoniae
			Bordetella sp.		Aspergillus fumigatus	S. infantis
					S. cerevisiae	Prevotella melaninogenica
					Schizophyllum comune	Porphyromonas sp.
						Achromobacter xylosoxidans
						Achromobacter sp.
						Bordetella sp.
*FEV1, forced expiratory volume in one second; NI, no identification.
